# Supplementary material for: Oxygen vacancy-dependent low-temperature performance of Ni/CeO2 in CO2 methanation
Source: Royal Society of Chemistry journal article supplement (doi:10.1039/d4cy00679h), 2024-01-01
Supplement: d4cy00679h1.pdf [file d4cy00679h1.pdf]

## Oxygen Vacancy-Dependent Low-Temperature Performance of Ni/CeO<sub>2</sub> in CO<sub>2</sub> Methanation

Luliang Liao<sup>b,†</sup>, Kunlei Wang<sup>a,†</sup>, Guangfu Liao<sup>c\*</sup>, Muhammad Asif Nawaz<sup>d\*</sup>, Kun Liu<sup>a\*</sup>

<sup>a</sup> School of Resources and Environment, Nanchang University, 999 Xuefu Road, Nanchang, Jiangxi, 330031, China

<sup>b</sup> Jiangxi Science Technology Normal University, Nanchang, Jiangxi, China

<sup>c</sup> College of Materials Engineering, Fujian Agriculture and Forestry University, Fuzhou 350002, China

<sup>d</sup> Department of Inorganic Chemistry and Material Sciences Institute of Seville (ICMSE), University of Seville-CSIC, Seville 41092, Spain

\* Corresponding author. E-mail: [liaogf@mail2.sysu.edu.cn](mailto:liaogf@mail2.sysu.edu.cn) (G. Liao), [mnawaz@us.es](mailto:mnawaz@us.es) (M. A. Nawaz), [liukun@ncu.edu.cn](mailto:liukun@ncu.edu.cn) (K. Liu)

† These authors contributed equally

## Content

|                                |   |
|--------------------------------|---|
| S1 Characterization .....      | 2 |
| S2. Supplementary Figure ..... | 3 |
| S3. Supplementary Table .....  | 5 |
| S4. References .....           | 7 |

### S1 Characterization

The performance of the catalyst is significantly influenced by its pore structure. X-ray diffraction (XRD) was employed with Cu K $\alpha$  radiation ( $\lambda = 1.5405 \text{ \AA}$ ), scanning  $2\theta$  angles from  $10$  to  $90^\circ$  at a speed of  $2^\circ/\text{min}$ , using a  $30 \text{ mA}$  tube current and  $40 \text{ kV}$  tube voltage. Micromeritics ASAP-2020 surface area analyzer was utilized for catalyst surface area analysis. Prior to testing, catalyst samples were vacuum-degassed at  $250^\circ\text{C}$  for 3 hours, followed by  $\text{N}_2$  adsorption-desorption at  $-196^\circ\text{C}$  to obtain BET surface area and pore volume, with pore size distribution determined using the BJH method. Raman analysis, conducted on a Renishaw spectrometer with a laser wavelength of  $532 \text{ nm}$ , explored surface defects over a range of  $200$  to  $900 \text{ cm}^{-1}$ .  $\text{CO}_2$ -TPD, crucial for investigating catalyst surface basicity, was performed using a Micromeritics AutoChem 2920 chemisorption analyzer. XPS, based on the photoelectric effect, facilitated qualitative and semi-quantitative/quantitative elemental and chemical state analysis of solid surfaces, utilizing a PHI 5000 CESCAs System with Al/Mg anode, operating at  $14.0 \text{ kV}$  and  $250 \text{ W}$ , with vacuum conditions better than  $1 \times 10^{-8} \text{ Torr}$ . Binding energy was calibrated with  $\text{C } 1s = 284.6 \text{ eV}$  as the reference. In-situ FTIR, crucial for

capturing intermediate species and elucidating reaction mechanisms, employed a Bruker instrument featuring a highly sensitive MCT detector. Prior to experimentation, samples underwent pretreatment at 300 °C in high-purity Ar, followed by cooling to 50 °C and background correction under Ar. Subsequently, a mixed gas (4% H<sub>2</sub>, 1% CO<sub>2</sub>, 95% Ar) was introduced for CO<sub>2</sub> hydrogenation testing, with a gas flow rate of 20 mL/min, ramping from 50 °C to 400 °C to monitor dynamic changes in intermediate species until reaching a steady state.

## S2. Supplementary Figure

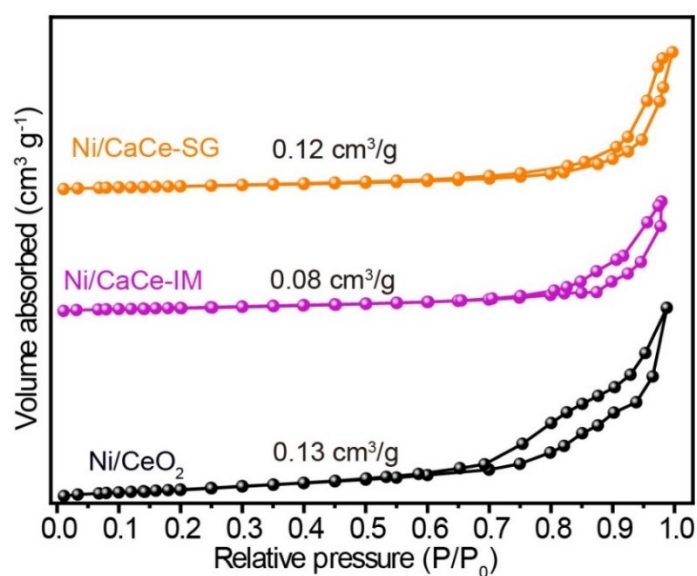

**Figure S1.** N<sub>2</sub> adsorption and desorption of the Ni/CaCe catalysts.

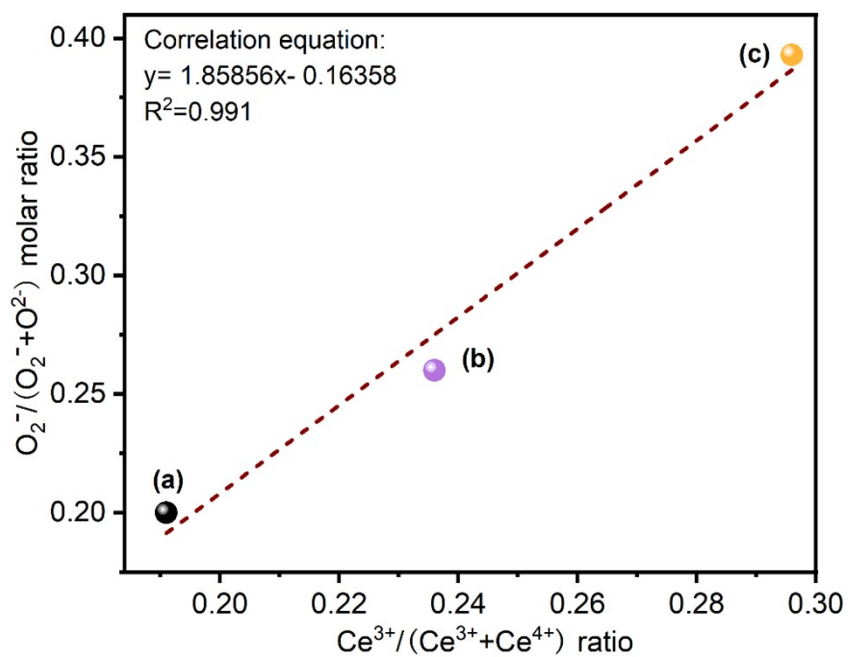

**Figure S2.** Surface  $\text{O}_2\cdot^-/(\text{O}_2\cdot^- + \text{O}_2^{2-})$  molar ratios versus  $\text{Ce}^{3+}/(\text{Ce}^{3+} + \text{Ce}^{4+})$  ratios on the Ni/CaCe catalysts. (a) Ni/CeO<sub>2</sub>, (b) Ni/CaCe-IM, (c) Ni/CaCe-SG.

### S3. Supplementary Table

**Table S1** Quantitative results of O<sub>2</sub><sup>-</sup> surface oxygen vacancies.

| Supports         | I <sub>570</sub> /I <sub>460</sub><br>(×10 <sup>-2</sup> ) | I <sub>1068</sub> /I <sub>460</sub><br>(×10 <sup>-2</sup> ) |
|------------------|------------------------------------------------------------|-------------------------------------------------------------|
| CeO <sub>2</sub> | 0.8                                                        | 1.2                                                         |
| CaCe-IM          | 1.2                                                        | 1.5                                                         |
| CaCe-SG          | 4.6                                                        | 4.4                                                         |

**Table S2** Quantitative results of XPS

| Catalysts           | Relative amount (%)           |                                 |                   | O <sub>2</sub> <sup>-</sup> /<br>(O <sub>2</sub> <sup>-</sup> +O <sup>2-</sup> ) <sup>a</sup><br>(%) | Ce <sup>3+</sup> /<br>(Ce <sup>3+</sup> +Ce <sup>4+</sup> ) <sup>a</sup><br>(%) | M/<br>(Ce+M)<br>molar<br>ratio <sup>b</sup> |
|---------------------|-------------------------------|---------------------------------|-------------------|------------------------------------------------------------------------------------------------------|---------------------------------------------------------------------------------|---------------------------------------------|
|                     | O <sub>2</sub> <sup>- a</sup> | CO <sub>3</sub> <sup>2- a</sup> | O <sup>2- a</sup> |                                                                                                      |                                                                                 |                                             |
| Ni/CeO <sub>2</sub> | 17.5                          | 14.4                            | 68.1              | 20.3                                                                                                 | 19.1                                                                            | -                                           |
| Ni/CaCe-IM          | 16.3                          | 35.3                            | 48.4              | 26.0                                                                                                 | 23.6                                                                            | 0.096                                       |
| Ni/CaCe-SG          | 28.1                          | 24.6                            | 47.3              | 39.3                                                                                                 | 29.6                                                                            | 0.091                                       |

<sup>a</sup> Measured by XPS.

<sup>b</sup> Measured by ICP.

**Table S3** Quantitative results of the activation energy and reaction rate

| Catalysts           | R <sub>w</sub> <sup>a</sup> (250 °C)<br>[10 <sup>-3</sup> mmol s <sup>-1</sup> g <sup>-1</sup> ] | R <sub>S</sub> <sup>b</sup> (250 °C)<br>[10 <sup>-4</sup> mmol s <sup>-1</sup> m <sup>-2</sup> ] | E <sub>a</sub> <sup>c</sup><br>[kJ mol <sup>-1</sup> ] |
|---------------------|--------------------------------------------------------------------------------------------------|--------------------------------------------------------------------------------------------------|--------------------------------------------------------|
| Ni/CeO <sub>2</sub> | 3.0                                                                                              | 1.4                                                                                              | 111                                                    |
| Ni/CaCe-IM          | 6.6                                                                                              | 3.9                                                                                              | 104                                                    |
| Ni/CaCe-SG          | 11.6                                                                                             | 6.9                                                                                              | 82                                                     |

**Table S4** Quantitative results of H<sub>2</sub>-TPD

| Catalysts           | Ni contents (wt%) <sup>a</sup> | H <sub>2</sub> desorption amount (μmol g <sup>-1</sup> ) | Metallic Ni surface area (m <sup>2</sup> g <sub>Ni</sub> <sup>-1</sup> ) <sup>b</sup> | Dispersion (%) <sup>b</sup> | TOF <sub>CO2</sub> (s <sup>-1</sup> ) <sup>c</sup> |
|---------------------|--------------------------------|----------------------------------------------------------|---------------------------------------------------------------------------------------|-----------------------------|----------------------------------------------------|
| Ni/CeO <sub>2</sub> | 9.3                            | 38.8                                                     | 20.8                                                                                  | 2.5                         | 0.03                                               |
| Ni/CaCe-IM          | 9.2                            | 50.8                                                     | 26.5                                                                                  | 3.1                         | 0.07                                               |
| Ni/CaCe-SG          | 9.2                            | 60.9                                                     | 31.8                                                                                  | 3.9                         | 0.10                                               |

<sup>a</sup>Determined by ICP.

<sup>b</sup>Pt/Al<sub>2</sub>O<sub>3</sub> (D = 34.5%) was used as the standard. Based on the cross-sectional area of one surface Ni atom,  $8.24 \times 10^{-20}$  m<sup>2</sup>.

<sup>c</sup>Calculated based on the steady state CO<sub>2</sub> conversion at 250 °C.

**Table S5** Quantitative results of CO<sub>2</sub>-TPD

| Catalysts           | Weak alkaline site amount (μmol m <sup>-2</sup> ) | Moderate alkaline site amount (μmol m <sup>-2</sup> ) | Total amount below 450 °C (μmol m <sup>-2</sup> ) |
|---------------------|---------------------------------------------------|-------------------------------------------------------|---------------------------------------------------|
| Ni/CeO <sub>2</sub> | 1.2                                               | 1.1                                                   | 2.3                                               |
| Ni/CaCe-IM          | 1.3                                               | 1.9                                                   | 3.1                                               |
| Ni/CaCe-SG          | 1.9                                               | 2.5                                                   | 4.5                                               |

**Table S6** A literature summary of Ni-based catalysts in CO<sub>2</sub> methanation

| Entry | Catalysts                 | Ni%<br>(wt%) | Reaction condition                      |           |            | GHSV<br>(mL/g <sub>cat</sub> h) | CO <sub>2</sub><br>conver<br>sion<br>(%) | Ref         |
|-------|---------------------------|--------------|-----------------------------------------|-----------|------------|---------------------------------|------------------------------------------|-------------|
|       |                           |              | S <sub>BET</sub><br>(m <sup>2</sup> /g) | T<br>(°C) | P<br>(bar) |                                 |                                          |             |
| 1     | 2Ni-2Co /CeO <sub>2</sub> | 2            | -                                       | 290       | 1          | 12000                           | 5                                        | [1]         |
| 2     | 2Ni-2Mn/CeO <sub>2</sub>  | 2            | -                                       | 290       | 1          | 12000                           | 4                                        | [1]         |
| 3     | Ni/CeO <sub>2</sub> -10   | 10           | 27.9                                    | 275       | 1          | 30000                           | 28                                       | [2]         |
| 4     | NiCe/ZrO <sub>2</sub>     | 10           | 5.2                                     | 350       | 1          | 18000                           | 48                                       | [3]         |
| 5     | NiLa/ZrO <sub>2</sub>     | 10           | 6                                       | 350       | 1          | 18000                           | 37                                       | [3]         |
| 6     | Ni/CeO <sub>2</sub>       | 10           | 84                                      | 350       | 1          | 18000                           | 55                                       | [3]         |
| 10    | NiO/CeO <sub>2</sub>      | 10           | -                                       | 300       | 1          | 36000                           | 58                                       | [4]         |
| 11    | Ni/CeO <sub>2</sub> -NR   | 8            | 72                                      | 300       | 1          | 16500                           | 68                                       | [5]         |
| 12    | 10NiCe                    | 10           | -                                       | 300       | 1          | 72000                           | 71                                       | [6]         |
| 13    | Ni/CeO <sub>2</sub>       | 2            | 31                                      | 275       | 1          | 30000                           | 32                                       | [7]         |
| 14    | Ni/CeO <sub>2</sub> -NR   | 8            | 72                                      | 275       | 1          | 30000                           | 79                                       | [8]         |
| 15    | Ni/CaCe-SG                | 10           | 26                                      | 290       | 1          | 18000                           | 77                                       | This<br>wok |

## S4. References

1. C. G. Wasnik, M. Nakamura, T. Shimada, H. Machida, K. Norinaga, *Carbon Resources Conversion*, 2024, 100241.
2. L. Li, L. Jiang, D. Li, J. Yuan, G. Bao, K. Li, *Appl. Catal. O: Open*, 2024, **192**, 206956.
3. R. A. El-Salamony, K. Acharya, A. S. Al-Fatesh, A. I. Osman, S. B. Alreshaidan, N. S. Kumar, H. Ahmed, R. Kumar, *Mol. Catal.*, 2023, **547**, 113378.
4. I. Martínez-López, J. C. Martínez-Fuentes, J. Bueno-Ferrer, A. Davó-Quñonero, E. Guillén-Bas, E. Bailón-García, D. Lozano-Castelló, A. Bueno-López, *J. CO<sub>2</sub> Util.*, **81**, 102733.

5. G. Varvoutis, A. Lampropoulos, P. Oikonomou, C.-D. Andreouli, V. Stathopoulos, M. Lykaki, G. E. Marnellos, M. Konsolakis, *J. CO<sub>2</sub> Util.*, 2023, **70**, 102425.
6. L. Atzori, M. G. Cutrufello, D. Meloni, F. Secci, C. Cannas, E. Rombi, *Int. J. Hydrogen Energy*, 2023, **48**, 25031-25043.
7. N. García-Moncada, J. C. Navarro, J. A. Odriozola, L. Lefferts, J. A. Faria, *Catal. Today*, 2022, **383**, 205-215.
8. G. Varvoutis, M. Lykaki, S. Stefa, E. Papista, S. A. C. Carabineiro, G. E. Marnellos, M. Konsolakis, *Catal. Commun.*, 2020, **142**, 106036.
